# Supplementary material
Source: PubMed Central journal article supplement (PMC3364922)
Supplement: supp_111.096230_biolreprod.111.096230-1.pdf [file supp_111.096230_biolreprod.111.096230-1.pdf]

**Wu et al., Supplemental Figure S1.** CLDN11 staining is co-localized with TJP1 (ZO-1) in *Cldn11*<sup>-/-</sup>:Tg(*Cldn11*)605Gow<sup>Tg/+</sup> mice.

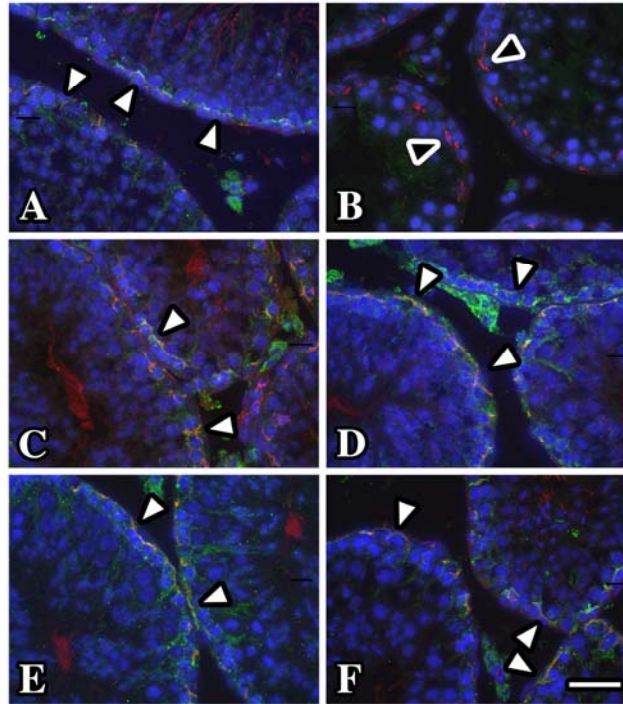

Immunofluorescence labeling of seminiferous tubules with antibodies against CLDN11 (green) and TJP1 (ZO-1)(red). Nuclei are labeled with DAPI (blue). **A)** Wild type seminiferous tubules as well as tubules from *Cldn11*<sup>-/-</sup>:Tg(*Cldn11*)605Gow<sup>Tg/+</sup> mice lines #5 (**C**), #8 (**D**), #11 (**E**) and #12 (**F**) show similarly high densities of nuclei indicative of normal testis morphology. CLDN11 and TJP1 (ZO-1) are co-localized in multiple locations around the edges of the seminiferous tubules (white arrowheads) which are appropriate locations for Sertoli cell TJs. **B)** In contrast, seminiferous tubules from *Cldn11*<sup>-/-</sup> mice are hypocellular and, although TJP1 (ZO-1) staining is reminiscent of TJ localization, CLDN11 staining is absent (black arrowheads) and there is no evidence of TJ intramembranous particles by freeze-fracture electron microscopy [2]. Panels A, B and E are replicas of Figure 1Ca – c, respectively and have been included here for completeness. Scale bar in F = 40  $\mu$ m.
